# Supplementary material for: A label-free fluorescent sensor for the detection of Pb2+ and Hg2+
Source: Royal Society of Chemistry journal article supplement (doi:10.1039/c5ay01282a), 2015-01-01
Supplement: c5ay01282a1.pdf [file c5ay01282a1.pdf]

## Electronic Supplementary Information

### Label-free fluorescent sensor for detection of Pb<sup>2+</sup> and Hg<sup>2+</sup>

Hanchu Xu,<sup>a</sup> Shenshan Zhan,<sup>a</sup> Dongwei Zhang,<sup>b</sup> Bing Xia,<sup>b</sup> Xuejia Zhan,<sup>a</sup> Lumei Wang<sup>a</sup> and Pei Zhou<sup>a\*</sup>

<sup>a</sup>School of Agriculture and Biology, and Key Laboratory of Urban Agriculture (South), Ministry of Agriculture, and Bor S. Luh Food Safety Research Center, Shanghai Jiao Tong University, Shanghai, 200240, China. E-mail: zhoupei@sjtu.edu.cn; Fax: +86-21-34205762; Tel: +86-21-34205762.

<sup>b</sup>School of Chemical and Environmental Engineering, Shanghai Institute of Technology, Shanghai, 201418, China.

**Table S1** Comparison of performances of different sensors for detection of two or more heavy metal ions

| Method           | Targets          | Linear ranges | LOD     | Sensing system                                   | reference    |
|------------------|------------------|---------------|---------|--------------------------------------------------|--------------|
| Fluorescent      | Pb <sup>2+</sup> | 0-386.4 nM    | ~10 nM  | Modified T30695,                                 | Current work |
|                  | Hg <sup>2+</sup> | 0-299.4 nM    | ~5.7 nM | SYBR Green I                                     |              |
| Fluorescent      | Hg <sup>2+</sup> | 0-100 nM      | 5 nM    | DNA, Ag                                          | 1            |
|                  | Cu <sup>2+</sup> | 0-2 μM        | 10 nM   | nanoclusters                                     |              |
| Fluorescent      | Hg <sup>2+</sup> | 20-150 nM     | 15 nM   | FAM-labeled DNA,                                 | 2            |
|                  | Ag <sup>+</sup>  | 20-150 nM     | 18 nM   | ROX-labeled DNA,                                 |              |
|                  | Pb <sup>2+</sup> | 20-150 nM     | 20 nM   | Cy5-labeled DNA,<br>Carbon nanotubes             |              |
| Fluorescent      | Hg <sup>2+</sup> | 0-20 nM       | 1.8 nM  | TAMRA-labeled                                    | 3            |
|                  | Ag <sup>+</sup>  | 0-20 nM       | 2.5 nM  | ssDNA, Cy5-labeled<br>ssDNA, CdTe QDs            |              |
| Electrochemical  | Pb <sup>2+</sup> | 10 pM-10 μM   | 10 pM   | DNA (1+2+3),                                     | 4            |
|                  | Ag <sup>+</sup>  | 100 nM-800 nM | 10 nM   | G-rich DNA,                                      |              |
|                  | Hg <sup>2+</sup> | 0.1 nM-10 μM  | 0.1 nM  | C-rich DNA,<br>EDTA, cysteine                    |              |
| Electrochemical  | Pb <sup>2+</sup> | 1 pM-100 μM   | 0.1 pM  | Pb <sup>2+</sup> -specific                       | 5            |
|                  | Hg <sup>2+</sup> | 1 pM-100 μM   | 1 pM    | DNAzyme, mercury-<br>specific<br>oligonucleotide |              |
| Surface-enhanced | Hg <sup>2+</sup> | 0-1 μM        | 500 pM  | Six DNA, DTT, NAP-                               | 6            |
| Raman scattering | Ag <sup>+</sup>  | 0-10 μM       | 1 nM    | 5 column, Au NWs                                 |              |
| Colorimetric     | Hg <sup>2+</sup> | 0-100 μM      | 50 nM   | Tween 20-AuNPs,                                  | 7            |
|                  |                  | 200-800 nM    | 0.1 μM  |                                                  |              |
|                  | Ag <sup>+</sup>  | 400-1000 nM   | 0.1 μM  |                                                  |              |

### Supplementary Materials and Methods

#### Determination of pH

When investigated the influence of pH on the Hg<sup>2+</sup> and Pb<sup>2+</sup> testing, 50 nM modified T30695 was firstly added into Tris-acetate buffer (10 mM, pH varying from 5 to 11) of appropriate volume, and then Hg<sup>2+</sup> or Pb<sup>2+</sup> of 250 ppb were respectively introduced into the above solution. After incubated at room temperature and 30 min, 4 μL of 50× SG were added into Hg<sup>2+</sup> samples and 6 μL of 400× SG were added into Pb<sup>2+</sup> samples. The fluorescence intensity of each sample was monitored after kept in darkness at room temperature and 15 min.

### Determination of temperature

In this study, the optimization of temperature included two parts: the incubation temperature between  $\text{Pb}^{2+}$  or  $\text{Hg}^{2+}$  and modified T30695, and the reaction temperature of the reaction between SG and G-quaduplex or T-Hg(II)-T. For optimization of the reaction temperature, the incubation temperature was set at room temperature (25 °C), and SG were introduced into the sensing system to react at varying temperature (from 15 to 75 °C). For optimization of the incubation temperature, modified T30695,  $\text{Pb}^{2+}$  or  $\text{Hg}^{2+}$  and Tris-acetate buffer were incubated at varying temperature, and SG were added to react at the optimal reaction temperature. Control experiments were carried out by replacing  $\text{Pb}^{2+}$  or  $\text{Hg}^{2+}$  with ultrapure water.

### Determination of time

In this study, the analysis time included two parts: the incubation time of  $\text{Pb}^{2+}$  or  $\text{Hg}^{2+}$  with modified T30695, and the reaction time of the reaction between SG and G-quaduplex or T-Hg(II)-T mixing solution. For optimization of the reaction time, 50 nM modified T30695,  $\text{Pb}^{2+}$  or  $\text{Hg}^{2+}$  and appropriate volume of Tris-acetate buffer was incubated at 30 min, and SG were added to react at varying time. For optimization of the incubation time, modified T30695,  $\text{Pb}^{2+}$  or  $\text{Hg}^{2+}$  and Tris-acetate buffer were incubated at varying time, and SG were added to react at the optimal reaction time. Control experiments were carried out by replacing  $\text{Pb}^{2+}$  or  $\text{Hg}^{2+}$  with ultrapure water.

## Supplementary Results and Discussion

### Determination of pH

As shown in Fig. S1, the influence of pH was studied. It could be seen that for the  $\text{Pb}^{2+}$  detection the relative fluorescence intensity increased as the pH changed from 5 to 8, after which the relative fluorescence intensity decreased dramatically. As for the  $\text{Hg}^{2+}$  detection, the relative fluorescence intensity reached the maximum when pH=8. Therefore, pH=8 was chose in all the following study.

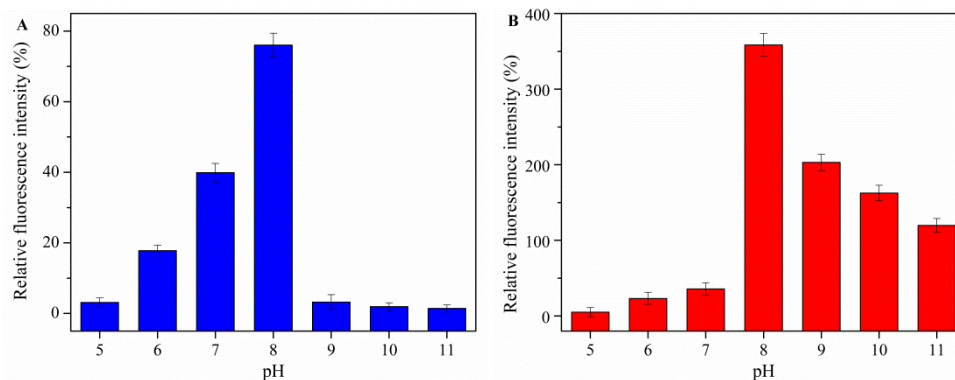

Fig. S1 Determination of pH on the relative fluorescence intensity that caused by 250 ppb  $\text{Pb}^{2+}$  (A) and  $\text{Hg}^{2+}$  (B) separately in different sensing systems that use Tris-acetate buffer (10 mM) of different pH.

### Determination of temperature

As a key parameter to this sensing system, the analysis temperature was also investigated. As shown in Fig. S2, the relative fluorescence intensity decreases with the increase of temperature (from 25 °C to 75 °C) for  $\text{Hg}^{2+}$  detection and the relative fluorescence intensity changes a little with the increase of temperature (from 15 °C to 75 °C) for  $\text{Pb}^{2+}$  detection. Therefore, 25 °C was chose as the incubation temperature and reaction temperature. Moreover, 25 °C suit the potential for real-time detection of this sensor.

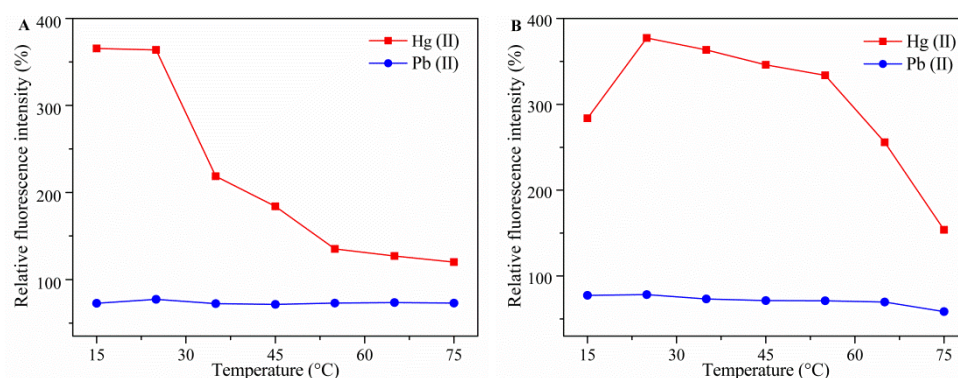

Fig. S2 Determination of reaction temperature (A) and incubation temperature (B) on relative fluorescence intensity. The solution contains 50 nM modified T30695, 250 ppb Pb<sup>2+</sup> or Hg<sup>2+</sup> and optimal concentration of SG.

#### Determination of time

In order to obtain a highly sensitive sensor, it is necessary to optimize the analysis time. The results were shown in Fig. S3 (A), when the reaction time is changed, the fluorescence intensity reaches its peak at ~15 min for Hg<sup>2+</sup> detection and the fluorescence intensity have almost no change for Pb<sup>2+</sup> detection. Fig. S3 (B) shows that at varying incubation time, the fluorescence intensity achieves maximum at 30 min for Hg<sup>2+</sup> and Pb<sup>2+</sup> detection. Therefore, by taking into account the performances of the both systems, 15 min was selected as the reaction time and 30 min was selected as the incubation time.

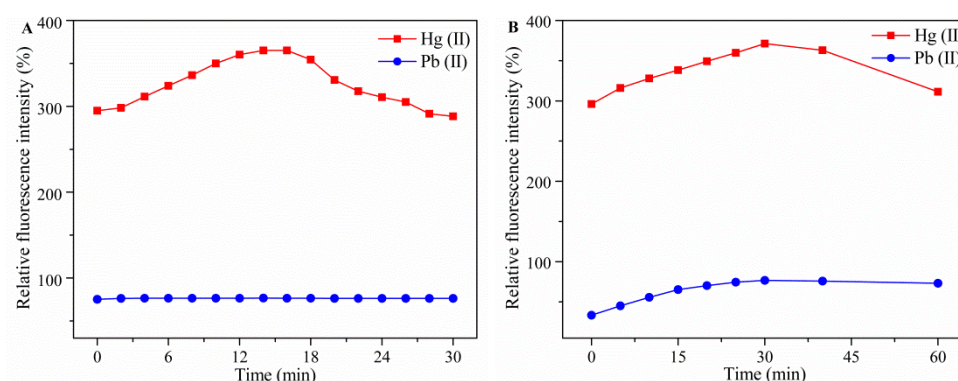

Fig. S3 Determination of reaction time (A) and incubation time (B) on relative fluorescence intensity. The solution contains 50 nM modified T30695, 250 ppb Pb<sup>2+</sup> or Hg<sup>2+</sup> and optimal concentration of SG.

#### References

- 1 S. Li, W. Cao, A. Kumar, S. Jin, Y. Zhao, C. Zhang, G. Zou, P. C. Wang, F. Li and X. Liang, *New. J. Chem.*, 2014, **38**, 1546-1550.
- 2 S. Wang and S. Si, *Anal. Methods*, 2013, **5**, 2947-2953.
- 3 C. Hao, L. Xua, C. Xing, H. Kuang, L. Wang and C. Xu, *Biosens. Bioelectron.*, 2012, **36**, 174-178.
- 4 Z. Lin, X. Li and H. Kraatz, *Anal. Chem.*, 2011, **83**, 6896-6901.
- 5 L. Shi, G. Liang, X. Li and X. Liu, *Anal. Methods*, 2012, **4**, 1036-1040.
- 6 S. MináYoo and S. YupáLee, *Lab. Chip*, 2012, **12**, 3077-3081.
- 7 C. Lin, C. Yu, Y. Lin and W. Tseng, *Anal. Chem.*, 2010, **82**, 6830-6837.
